# Supplementary material
Source: PubMed Central journal article supplement (PMC3386109)
Supplement: 1201433109_pnas.201201433SI.pdf [file 1201433109_pnas.201201433SI.pdf]

# Supporting Information

Wang et al. 10.1073/pnas.1201433109

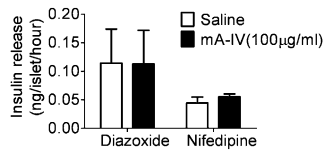

**Fig. 51.** Islets were stimulated with 20 mM glucose plus 250 μM diazoxide or 20 mM glucose plus 10 μM nifedipine in the absence or presence of 100 μg/mL of mA-IV; *n* = 4.

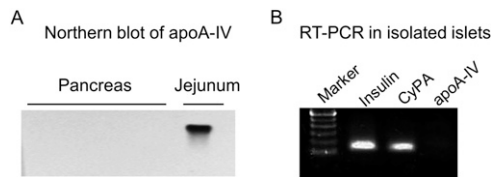

**Fig. 52.** ApoA-IV mRNA is not detectable in pancreas of WT mice.

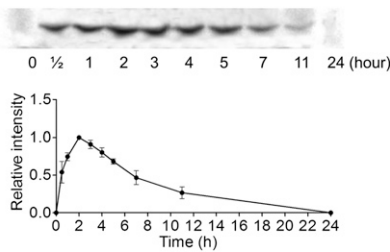

**Fig. 53.** Measurement of mA-IV plasma level after i.p. injection in apoA-IV<sup>-/-</sup> mice; *n* = 3.

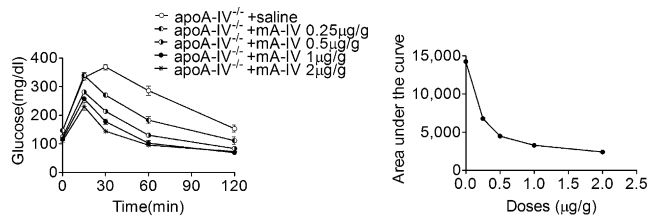

**Fig. 54.** mA-IV injected i.p. induced a dose-dependent improvement in glucose tolerance in apoA-IV<sup>-/-</sup> mice; *n* = 4.

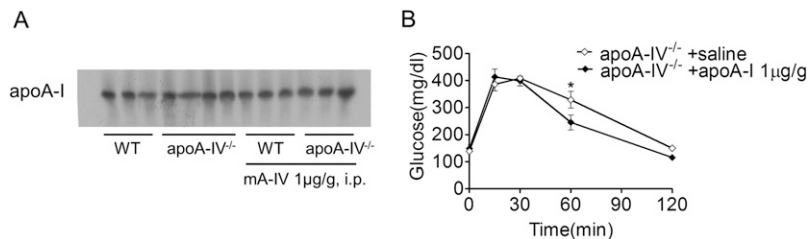

**Fig. 55.** (A) Plasma levels of apoA-I in WT and apoA-IV<sup>-/-</sup> mice with or without mA-IV treatment. (B) Effect of supplemental apoA-I on regulation of glucose tolerance in apoA-IV<sup>-/-</sup> mice; *n* = 4. \**P* < 0.05 vs. saline.

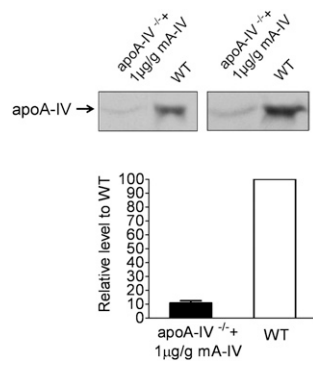

**Fig. S6.** Plasma levels of apoA-IV in apoA-IV<sup>-/-</sup> mice at 2 h after i.p. injection of 1 μg/g of mA-IV and in WT mice;  $n = 3$ .
